# Supplementary material for: Oncological Outcome of Primary and Secondary Muscle-Invasive Bladder Cancer: A Systematic Review and Meta-analysis
Source: PubMed Central journal article supplement (PMC5954122; doi:10.1038/s41598-018-26002-6), 2018-05-15
Supplement: 41598_2018_26002_MOESM1_ESM.pdf [file 41598_2018_26002_MOESM1_ESM.pdf]

# **Oncological Outcome of Primary and Secondary Muscle-Invasive Bladder Cancer: A Systematic Review and Meta-analysis**

Peng Ge<sup>1,+,\*</sup>, Li Wang<sup>2,+</sup>, Meng Lu<sup>1</sup>, Lijun Mao<sup>1</sup>, Wang Li<sup>1</sup>, Rumin Wen<sup>1</sup>, Jian  
Lin<sup>3,4</sup>, Junqi Wang<sup>1,\*</sup> and Jiacun Chen<sup>1,\*</sup>

<sup>1</sup>Department of Urology, the affiliated hospital of Xuzhou Medical University,  
Xuzhou, Jiangsu, China.

<sup>2</sup>Xuzhou Medical University, Xuzhou, Jiangsu, China.

<sup>3</sup>Department of Urology, Peking University First Hospital and Institute of  
Urology, Peking University, Beijing, China.

<sup>4</sup>National Research Center for Genitourinary Oncology, Beijing, China.

<sup>+</sup>These authors contributed equally to this work.

<sup>\*</sup>Correspondence and requests for materials should be addressed to J.W.

(email: wjq68@sina.cn) or J.C. (email: cjc7812@163.com) or P.G.

(gepengyuz@126.com)

## Contents

|                                                              |    |
|--------------------------------------------------------------|----|
| <b>Figure S1</b> .....                                       | 3  |
| <b>More information of full-text articles excluded</b> ..... | 4  |
| <b>Table S1</b> .....                                        | 11 |
| <b>Table S2</b> .....                                        | 12 |
| <b>Figure S2</b> .....                                       | 13 |
| <b>Figure S3</b> .....                                       | 14 |
| <b>Search strategy</b> .....                                 | 15 |

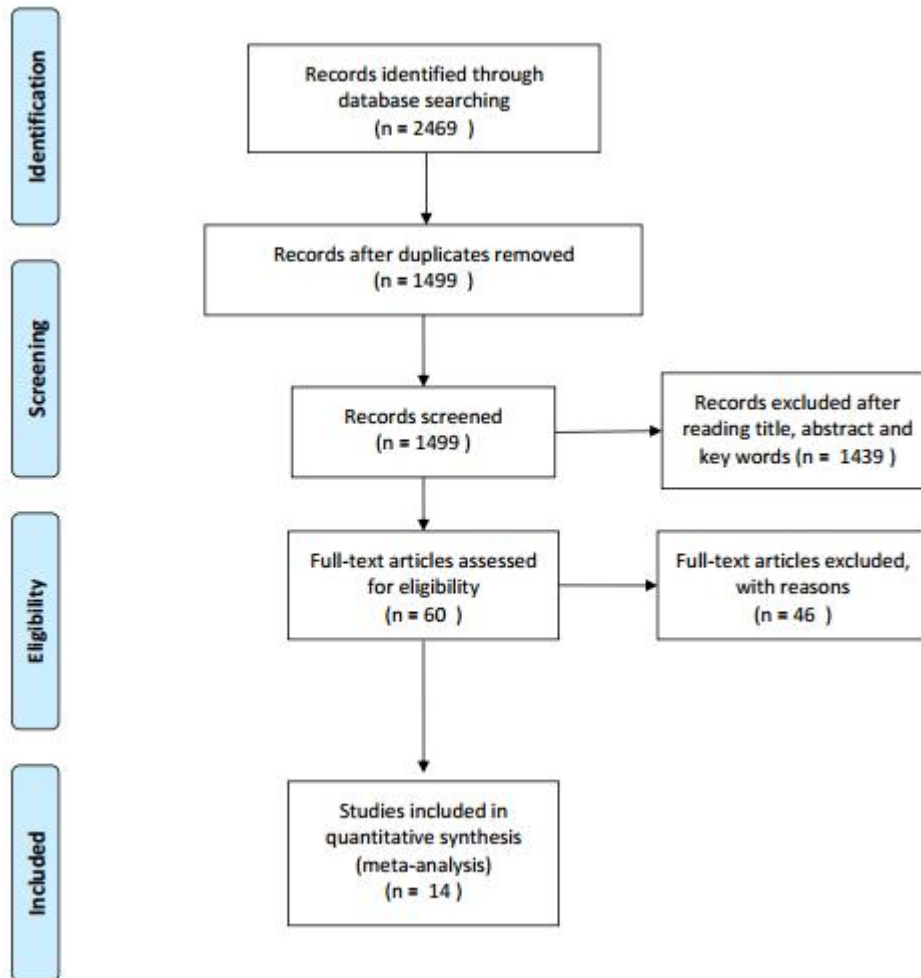

**Figure S1 Flow chart of the literature search used in this meta-analysis.** Of those studies, two studies (reference 6 and 15 in main text) were from a same medical center, in which data was not duplicate, and these studies were all include for pooled analysis

### More information of full-text articles excluded

**Abbreviation:** MIBC, muscle-invasive bladder cancer; CSS, Cancer-specific survival; OS, overall survival; RFS, recurrence-free survival; HR, hazard ratio; CI, confidence interval.

| No. | Author                   | Year | Main results                                                                                                                                                                                                | Reason for not including in pooled analysis                                                                                                    |
|-----|--------------------------|------|-------------------------------------------------------------------------------------------------------------------------------------------------------------------------------------------------------------|------------------------------------------------------------------------------------------------------------------------------------------------|
| 1   | Brant <sup>1</sup>       | 2017 | Among non-neoadjuvant chemotherapy patients, secondary MIBC was significantly less prevalent in patients who achieved pathologic response compared with those who did not respond (3.6% vs. 25.2%, P<0.01). | Inadequate information.<br>CSS was not available.                                                                                              |
| 2   | Zakaria <sup>2</sup>     | 2016 | Presumed secondary MIBC had a slightly better prognosis, regarding OS.                                                                                                                                      | Histopathologic or staging clinical information was lacking and primary and secondary MIBC were indirectly presumed.<br>CSS was not available. |
| 3   | Pietzak <sup>3</sup>     | 2016 | -                                                                                                                                                                                                           | Abstract                                                                                                                                       |
| 4   | Brant <sup>4</sup>       | 2016 | -                                                                                                                                                                                                           | Abstract                                                                                                                                       |
| 5   | Moschini <sup>5</sup>    | 2016 | -                                                                                                                                                                                                           | Abstract                                                                                                                                       |
| 6   | Mallen <sup>6</sup>      | 2015 | -                                                                                                                                                                                                           | Inadequate information.<br>CSS was not available.                                                                                              |
| 7   | Pietzak <sup>7</sup>     | 2015 | -                                                                                                                                                                                                           | Abstract                                                                                                                                       |
| 8   | Pietzak <sup>8</sup>     | 2015 | Secondary MIBC was associated with upstaging and had a worse OS.                                                                                                                                            | Inadequate information.<br>CSS was not available.                                                                                              |
| 9   | Parra-Lopez <sup>9</sup> | 2014 | -                                                                                                                                                                                                           | Abstract                                                                                                                                       |
| 10  | Pellucchi <sup>10</sup>  | 2014 | -                                                                                                                                                                                                           | Abstract                                                                                                                                       |
| 11  | Alexandra <sup>11</sup>  | 2013 | -                                                                                                                                                                                                           | Abstract                                                                                                                                       |

|    |                                |      |                                                                                                                                                                                                       |                                                                                                                                                                                                                 |
|----|--------------------------------|------|-------------------------------------------------------------------------------------------------------------------------------------------------------------------------------------------------------|-----------------------------------------------------------------------------------------------------------------------------------------------------------------------------------------------------------------|
| 12 | Koga <sup>12</sup>             | 2013 | -                                                                                                                                                                                                     | Irrelevant topic                                                                                                                                                                                                |
| 13 | Husillos-Alonso <sup>13</sup>  | 2013 | Secondary MIBC had a similar tumor progression rate compared to primary MIBC (24.1% v.s. 23.5%).                                                                                                      | Inadequate information.                                                                                                                                                                                         |
| 14 | Ma <sup>14</sup>               | 2013 | MIBC with prior history of urothelial carcinoma was associated with both CSS (HR 3.235, CI 1.211-8.644, P=0.019) and RFS (HR 2.713, CI 1.231-5.978, P=0.013) and weakly associated with OS (P=0.064). | MIBC with prior history of urothelial carcinoma was not exactly equal to secondary MIBC.<br><b>If this study was included in pooled analysis, the conclusion drawn in the study would be further confirmed.</b> |
| 15 | Ciudin <sup>15</sup>           | 2012 | -                                                                                                                                                                                                     | Abstract                                                                                                                                                                                                        |
| 16 | Ciudin <sup>16</sup>           | 2012 | -                                                                                                                                                                                                     | Abstract                                                                                                                                                                                                        |
| 17 | Ciudin <sup>17</sup>           | 2012 | -                                                                                                                                                                                                     | Abstract                                                                                                                                                                                                        |
| 18 | Ciudin <sup>18</sup>           | 2011 | -                                                                                                                                                                                                     | Abstract                                                                                                                                                                                                        |
| 19 | Ploeg <sup>19</sup>            | 2011 | -                                                                                                                                                                                                     | Inadequate information.                                                                                                                                                                                         |
| 20 | Villavicencio <sup>20</sup>    | 2010 | -                                                                                                                                                                                                     | Less than 10 patients in secondary MIBC group and/or primary MIBC.                                                                                                                                              |
| 21 | Brookman-Amissah <sup>21</sup> | 2009 | -                                                                                                                                                                                                     | Abstract                                                                                                                                                                                                        |
| 22 | Guzzo <sup>22</sup>            | 2009 | -                                                                                                                                                                                                     | Abstract                                                                                                                                                                                                        |
| 23 | Huguet <sup>23</sup>           | 2008 | -                                                                                                                                                                                                     | Irrelevant topic                                                                                                                                                                                                |

|    |                             |      |                                                                                                                                                                                                    |                                                                                                                                                                                                                                                                                                                                                                                                                                  |
|----|-----------------------------|------|----------------------------------------------------------------------------------------------------------------------------------------------------------------------------------------------------|----------------------------------------------------------------------------------------------------------------------------------------------------------------------------------------------------------------------------------------------------------------------------------------------------------------------------------------------------------------------------------------------------------------------------------|
| 24 | Ferreira <sup>24</sup>      | 2007 | Secondary MIBC had similar prognosis compared to primary MIBC (5 years survival: 57.9% v.s. 52.2%).                                                                                                | Data is inconsistency.<br>According to the study, patients between 1993 and 2005 were included and manuscript was accepted for publication on October 11, 2006. Theoretically, the maximum follow-up time should be less than 166 months. However, figure 1 suggests that the maximum follow-up time is more than 180 months.<br><b>If this study was included in pooled analysis, no significant changes would be observed.</b> |
| 25 | May <sup>25</sup>           | 2007 | -                                                                                                                                                                                                  | Duplicate publication                                                                                                                                                                                                                                                                                                                                                                                                            |
| 26 | McLaughlin <sup>26</sup>    | 2007 | -                                                                                                                                                                                                  | Irrelevant topic                                                                                                                                                                                                                                                                                                                                                                                                                 |
| 27 | Louie-Johnsun <sup>27</sup> | 2007 | -                                                                                                                                                                                                  | Irrelevant topic                                                                                                                                                                                                                                                                                                                                                                                                                 |
| 28 | Kassouf <sup>28</sup>       | 2006 | -                                                                                                                                                                                                  | Less than 10 patients in secondary MIBC group and/or primary MIBC.                                                                                                                                                                                                                                                                                                                                                               |
| 29 | Jeon <sup>29</sup>          | 2005 | -                                                                                                                                                                                                  | Less than 10 patients in secondary MIBC group and/or primary MIBC.                                                                                                                                                                                                                                                                                                                                                               |
| 30 | May <sup>30</sup>           | 2004 | -                                                                                                                                                                                                  | Duplicate publication                                                                                                                                                                                                                                                                                                                                                                                                            |
| 31 | Hornak <sup>31</sup>        | 2004 | Secondary MIBC had worse prognosis compared to primary MIBC (3 years survival: 15.4% v.s. 23%).                                                                                                    | Full article is not available.<br>The study is in Slovak. We requested for full-text through ResearchGate, but no reply was received.                                                                                                                                                                                                                                                                                            |
| 32 | Knap <sup>32</sup>          | 2003 | Patients with primary invasive in lamina propria (T1) progressing to MIBC and with primary non-invasive (Ta, CIS) progressing to MIBC had a significantly poorer outcome compared to primary MIBC. | Inadequate information.<br>The prognosis of the overall secondary MIBC was not clear.                                                                                                                                                                                                                                                                                                                                            |

|    |                            |      |                                                                                                                  |                                                                                                                                                                                                                                                                                                         |
|----|----------------------------|------|------------------------------------------------------------------------------------------------------------------|---------------------------------------------------------------------------------------------------------------------------------------------------------------------------------------------------------------------------------------------------------------------------------------------------------|
| 33 | Hornak <sup>33</sup>       | 2003 | -                                                                                                                | Duplicate publication                                                                                                                                                                                                                                                                                   |
| 34 | Larsson <sup>34</sup>      | 2003 | -                                                                                                                | Inadequate information.                                                                                                                                                                                                                                                                                 |
| 35 | Yeo <sup>35</sup>          | 2002 | Primary MIBC had higher tumor grade and lower five-year survival rate compared to secondary MIBC ( $P < 0.05$ ). | Data is inconsistency.<br>According to the patients&methods part, the follow-up time was ranging from 36 to 98 months. However, figure 1 suggests that the minimum follow-up is less than 24 months.<br><b>If this study was included in pooled analysis, no significant changes would be observed.</b> |
| 36 | Vaidya <sup>36</sup>       | 2001 | -                                                                                                                | Inadequate information.                                                                                                                                                                                                                                                                                 |
| 37 | Huguet-Perez <sup>37</sup> | 2001 | -                                                                                                                | Less than 10 patients in secondary MIBC group and/or primary MIBC.                                                                                                                                                                                                                                      |
| 38 | Bassi <sup>38</sup>        | 1999 | -                                                                                                                | Inadequate information.                                                                                                                                                                                                                                                                                 |
| 39 | Irani <sup>39</sup>        | 1997 | -                                                                                                                | Inadequate information.                                                                                                                                                                                                                                                                                 |
| 40 | Fossa <sup>40</sup>        | 1992 | -                                                                                                                | Inadequate information.                                                                                                                                                                                                                                                                                 |
| 41 | Stockle <sup>41</sup>      | 1988 | -                                                                                                                | Inadequate information.                                                                                                                                                                                                                                                                                 |
| 42 | Malmstrom <sup>42</sup>    | 1987 | -                                                                                                                | Inadequate information.                                                                                                                                                                                                                                                                                 |
| 43 | Droller <sup>43</sup>      | 1983 | -                                                                                                                | Less than 10 patients in secondary MIBC group and/or primary MIBC.                                                                                                                                                                                                                                      |
| 44 | Hopkins <sup>44</sup>      | 1983 | -                                                                                                                | Less than 10 patients in secondary MIBC group and/or primary MIBC.                                                                                                                                                                                                                                      |
| 45 | Kaye <sup>45</sup>         | 1982 | -                                                                                                                | Inadequate information.                                                                                                                                                                                                                                                                                 |
| 46 | Boileau <sup>46</sup>      | 1980 | -                                                                                                                | Inadequate information.                                                                                                                                                                                                                                                                                 |

## References:

1. Brant, A., *et al.*. Pathologic response in patients receiving neoadjuvant chemotherapy for muscle-invasive bladder cancer: Is therapeutic effect owing to chemotherapy or TURBT? *Urol Oncol* **35**, 17-34 (2017).
2. Zakaria, A.S., Santos, F., Kassouf, W., Tanguay, S. & Aprikian, A. Survival after Radical Cystectomy for Bladder Cancer in Relation to Prior Non-Muscle Invasive Disease in Quebec. *Urol Int* (2016).
3. Pietzak, E., *et al.*. Progression from non-muscle invasive bladder cancer (NMIBC) to muscle invasion is associated with lower response rates to neoadjuvant chemotherapy. *J Urology* **195S**, E408-E409 (2016).
4. Brant, A., *et al.*. Effect of chemotherapy and/or TURBT on pathologic response in patients receiving neoadjuvant chemotherapy for muscle-invasive bladder cancer. *J Clin Oncol* **34**, no pagination (2016).
5. Moschini, M., *et al.*. Preoperative favourable characteristics in bladder cancer patients cannot substitute the necessity of extended lymphadenectomy during radical cystectomy: A sensitivity curve and a survival analysis. *European Urology, Supplements* **15**, e627 (2016).
6. Mallen, E., Gil, P. & Gil, M.J. Risk groups in bladder cancer patients treated with radical cystectomy. *Int Braz J Urol* **41**, 30-39 (2015).
7. Pietzak, E.J., Malkowicz, S.B. & Guzzo, T.J. Does "low risk" muscle invasive bladder cancer actually exist? *J Urol* **33**(2015).
8. Pietzak, E.J., Sterling, M.E., Smith, Z.L., Malkowicz, S.B. & Guzzo, T.J. Outcomes of radical cystectomy in potential candidates for bladder preservation therapy. *Urology* **85**, 869-875 (2015).
9. Parra-Lopez, L., *et al.*. Prognostic factors and survival differences between primary and progressive muscle-invasive bladder cancer. *European Urology, Supplements* (2014).
10. Pellucchi, F., *et al.*. Progression of T1 high risk into muscle-invasive bladder cancer is an independent prognostic factor of mortality after radical cystectomy. *J Urol* **191**, e685-e686 (2014).
11. Alexandra, M.L., *et al.*. Oncological outcome of radical cystectomy for BCG failure compared to primary invasive disease. *J Urol* **1**, e666 (2013).
12. Koga, F., *et al.*. Risk factors for intravesical tumor recurrence in muscle-invasive bladder cancer patients treated with selective bladder-sparing approaches. *European Urology, Supplements* **12**, e76-e77 (2013).
13. Husillos-Alonso, A., *et al.*. Prognostic factors in patients with stage pT0/pT1/pTa in the radical cystectomy specimen. *Arch Esp Urol* **66**, 787-795 (2013).
14. Ma, B., *et al.*. Lymphovascular invasion, ureteral reimplantation and prior history of urothelial carcinoma are associated with poor prognosis after partial cystectomy for muscle-invasive bladder cancer with negative pelvic lymph nodes. *Eur J Surg Oncol* **39**, 1150-1156 (2013).



15. Ciudin, A., Huguet, J., Peri, L., Ribal, M.J. & Alcaraz, A. T4 bladder tumour affecting the prostate. Prognostic differences depending on the bladder tumour evolution: Primary versus progressive tumours. *European Urology, Supplements* **11 (5)**, 199-200 (2012).
16. Ciudin, A., Huguet, J., Musquera, M., Ribal, M.J. & Alcaraz, A. Differences in patterns of prostatic stromal involvement between primary and progressive muscle invasive bladder tumours. *European Urology, Supplements* **11 (1)**, e719 (2012).
17. Ciudin, A., *et al.*. Prognosis of primary and progressive muscle-invasive urothelial bladder carcinoma - Is there a difference? *European Urology, Supplements* **11 (5)**, 199 (2012).
18. Ciudin, A., *et al.*. Prognosis of primary and progressive muscle-invasive urothelial bladder carcinoma - Is there a difference? *European Urology, Supplements* **10 (2)**, 241 (2011).
19. Ploeg, M., *et al.*. Prognostic factors for survival in patients with recurrence of muscle invasive bladder cancer after treatment with curative intent. *Clin Genitourin Cancer* **9**, 14-21 (2011).
20. Villavicencio, H., *et al.*. Bladder preservation strategy based on combined therapy in patients with muscle-invasive bladder cancer: management and results at long-term follow-up. *Urol Int* **85**, 281-286 (2010).
21. Brookman-Amis, S. & May, M. Radical cystectomy in the treatment of bladder cancer: Always in due time? *European Urology, Supplements* (2009).
22. Guzzo, T.J., *et al.*. Pathologic upstaging at the time of radical cystectomy is associated with worse recurrence free survival in patients with BCG-refractory bladder cancer. *J Urol* **1**, 641 (2009).
23. Huguet, J., *et al.*. Diagnosis, risk factors, and outcome of urethral recurrences following radical cystectomy for bladder cancer in 729 male patients. *Eur Urol* **53**, 785-792 (2008).
24. Ferreira, U., *et al.*. Primary invasive versus progressive invasive transitional cell bladder cancer: multicentric study of overall survival rate. *Urol Int* **79**, 200-203 (2007).
25. May, M., *et al.*. Radical cystectomy in the treatment of bladder cancer always in due time? *Urologe A* **46**, 913-919 (2007).
26. McLaughlin, S., *et al.*. Comparison of the clinical and pathologic staging in patients undergoing radical cystectomy for bladder cancer. *Int Braz J Urol* **33**, 25-31, 31-32 (2007).
27. Louie-Johnson, M.W., Braslis, K.G., Murphy, D.L., Neerhut, G.J. & Grills, R.J. Radical cystectomy for primary bladder malignancy: a 10 year review. *Anz J Surg* **77**, 265-269 (2007).
28. Kassouf, W., *et al.*. Partial cystectomy for muscle invasive urothelial carcinoma of the bladder: a contemporary review of the M. D. Anderson Cancer Center experience. *J Urol* **175**, 2058-2062 (2006).
29. Jeon, S.H., Jeon, S.H. & Chang, S.G. Clinical prognostic factors for radical cystectomy in bladder cancer. *Cancer Res Treat* **37**, 48-53 (2005).

30. May, M., Helke, C., Nitzke, T., Vogler, H. & Hoschke, B. Survival rates after radical cystectomy according to tumor stage of bladder carcinoma at first presentation. *Urol Int* **72**, 103-111 (2004).
31. Hornak, M. & Bardos, A. Biologic characteristics of invasive bladder cancer: is there a difference between primary and progressive tumours? *Rozhl Chir* **83**, 648-650 (2004).
32. Knap, M.M., Lundbeck, F. & Overgaard, J. Prognostic factors, pattern of recurrence and survival in a Danish bladder cancer cohort treated with radical cystectomy. *Acta Oncol* **42**, 160-168 (2003).
33. Horňák, M. & Bárdoš, A. Invasive bladder tumours: Analysis of clinical material. *Lekarsky Obzor* **52**, 360-362 (2003).
34. Larsson, P., *et al.*. A population-based study of 538 patients with newly detected urinary bladder neoplasms followed during 5 years. *Scand J Urol Nephrol* **37**, 195-201 (2003).
35. Yeo, J., Ko, Y., Ko, Y. & Yoon, D. The Prognostic Difference between the Invasive Bladder Cancer at the Initial Diagnosis and the Invasive Bladder Cancer Progressed from Superficial. *Korean J Urol* **2**, 112-116 (2002).
36. Vaidya, A., Soloway, M.S., Hawke, C., Tiguert, R. & Civantos, F. De novo muscle invasive bladder cancer: is there a change in trend? *J Urol* **165**, 47-50, 50 (2001).
37. Huguet-Perez, J., *et al.*. Upper tract transitional cell carcinoma following cystectomy for bladder cancer. *Eur Urol* **40**, 318-323 (2001).
38. Bassi, P., *et al.*. Prognostic factors of outcome after radical cystectomy for bladder cancer: a retrospective study of a homogeneous patient cohort. *J Urol* **161**, 1494-1497 (1999).
39. Irani, J., *et al.*. Clinical stage (t stage) and pathological stage (pt stage) in cystectomy for bladder cancer: which one is the main determinant of survival? *Br J Urol* **80**, 54 (1997).
40. Fossa, S.D., Ous, S., Espetveit, S. & Langmark, F. Patterns of primary care and survival in 336 consecutive unselected Norwegian patients with bladder cancer. *Scand J Urol Nephrol* **26**, 131-138 (1992).
41. Stockle, M., Jacobi, G.H. & Hohenfellner, R. [Importance of early cystectomy for the prognosis of cancer of bladder]. *J Urol (Paris)* **94**, 401-404 (1988).
42. Malmstrom, P.U., Busch, C. & Norlen, B.J. Recurrence, progression and survival in bladder cancer. A retrospective analysis of 232 patients with greater than or equal to 5-year follow-up. *Scand J Urol Nephrol* **21**, 185-195 (1987).
43. Droller, M.J. & Walsh, P.C. Therapeutic efficacy of salvage cystectomy. Do results reflect natural history of bladder cancer? *Urology* **22**, 118-122 (1983).
44. Hopkins, S.C., Ford, K.S. & Soloway, M.S. Invasive bladder cancer: support for screening. *J Urol* **130**, 61-64 (1983).
45. Kaye, K.W. & Lange, P.H. Mode of presentation of invasive bladder cancer: reassessment of the problem. *J Urol* **128**, 31-33 (1982).
46. Boileau, M.A., Johnson, D.E., Chan, R.C. & Gonzales, M.O. Bladder carcinoma: results with preoperative radiation therapy and radical cystectomy. *Urology* **16**, 569-576 (1980).

|                  | No. of studies | Pooled HR (95% CI) | Chi <sup>2</sup> (P value) | I <sup>2</sup> |
|------------------|----------------|--------------------|----------------------------|----------------|
| Total            | 13             | 1.29(1.07-1.56)    | 23.64(0.02)                | 49.2%          |
| Publication year |                |                    |                            |                |
| 2002-2011        | 7              | 1.33(0.91-1.94)    | 15.41(0.02)                | 61.1%          |
| 2012-2016        | 6              | 1.26(1.03-1.53)    | 7.66(0.18)                 | 34.7%          |
| Region           |                |                    |                            |                |
| Europe           | 8              | 1.29(0.96-1.73)    | 15.91(0.03)                | 56.0%          |
| Others           | 5              | 1.31(1.01-1.70)    | 7.55(0.11)                 | 47.0%          |
| No. of patients  |                |                    |                            |                |
| <200             | 8              | 1.34(0.99-1.81)    | 12.02(0.10)                | 41.8%          |
| ≥200             | 5              | 1.25(0.97-1.62)    | 11.24(0.02)                | 64.4%          |
| Quality score    |                |                    |                            |                |
| <6               | 7              | 1.50(1.17-1.94)    | 10.52(0.10)                | 43.0%          |
| ≥6               | 5              | 1.05(0.82-1.34)    | 6.11(0.19)                 | 34.5%          |
| HR estimation    |                |                    |                            |                |
| Univariate       | 7              | 1.17(0.95-1.43)    | 7.93(0.24)                 | 24.4%          |
| Multivariate     | 6              | 1.47(1.07-2.03)    | 12.40(0.03)                | 59.7%          |

HR: hazard ratio, CI: confidence interval

**Table S1** Subgroup analysis for cancer-specific survival in model I.

|                  | No. of studies | Pooled HR (95% CI) | Chi <sup>2</sup> ( <i>P</i> value) | <i>I</i> <sup>2</sup> |
|------------------|----------------|--------------------|------------------------------------|-----------------------|
| Total            | 13             | 1.19(0.90-1.56)    | 48.77(<0.001)                      | 75.4%                 |
| Publication year |                |                    |                                    |                       |
| 2002-2011        | 7              | 1.33(0.91-1.94)    | 15.41(0.02)                        | 61.1%                 |
| 2012-2016        | 6              | 1.07(0.74-1.56)    | 26.87(<0.001)                      | 81.4%                 |
| Region           |                |                    |                                    |                       |
| Europe           | 8              | 1.29(0.96-1.73)    | 15.91(0.03)                        | 56.0%                 |
| Others           | 5              | 1.07(0.65-1.76)    | 27.04(<0.001)                      | 85.2%                 |
| No. of patients  |                |                    |                                    |                       |
| <200             | 8              | 1.34(0.99-1.81)    | 12.02(0.10)                        | 41.8%                 |
| ≥200             | 5              | 1.05(0.68-1.61)    | 30.95(<0.001)                      | 87.1%                 |
| Quality score    |                |                    |                                    |                       |
| <6               | 7              | 1.31(0.79-2.17)    | 39.87(<0.001)                      | 85.0%                 |
| ≥6               | 5              | 1.05(0.82-1.34)    | 6.11(0.19)                         | 34.5%                 |
| HR estimation    |                |                    |                                    |                       |
| Univariate       | 6              | 1.11(0.85-1.44)    | 6.73(0.24)                         | 25.7%                 |
| Multivariate     | 7              | 1.29(0.83-1.99)    | 42.03(<0.001)                      | 85.7%                 |

HR: hazard ratio, CI: confidence interval

**Table S2** Subgroup analysis for cancer-specific survival in model II.

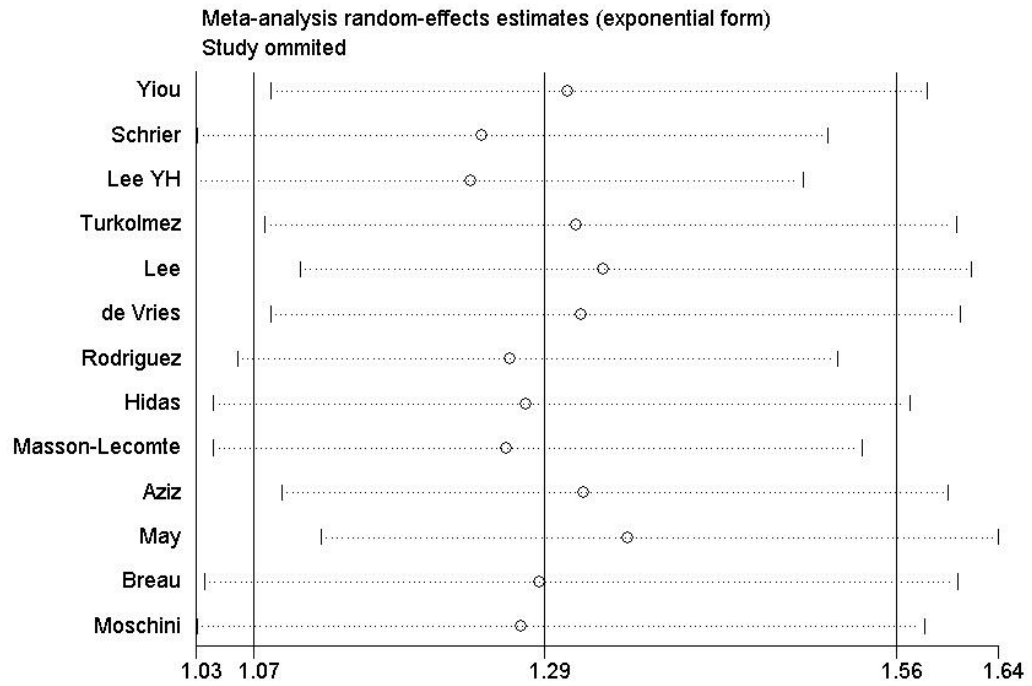

**Figure S2** Sensitivity Analyses by omitting a single study each time in model I.

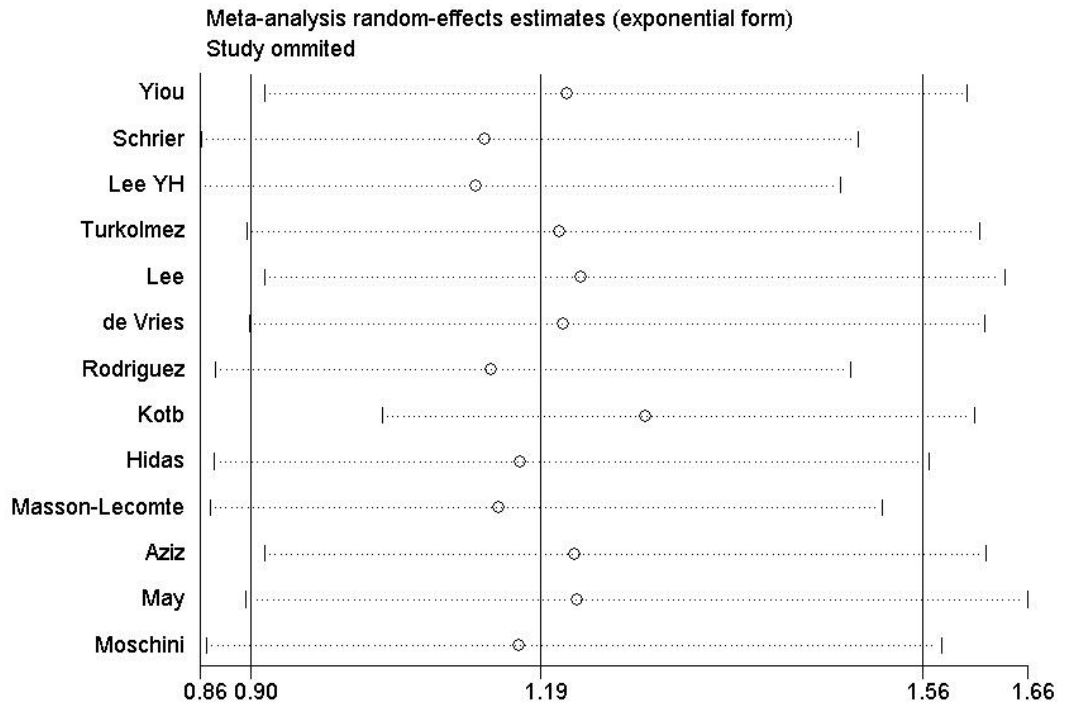

**Figure S3** Sensitivity Analyses by omitting a single study each time in model II.

## Search strategy

### Database: Embase <1974 to 2017 January 03>( on OVID)

- 1.exp bladder tumor/ (74306)
2. (bladder\$ adj3 (cancer\$ or carcinoma\$ or neoplas\$ or tumor\$r\$)).mp. (81689)
3. exp transitional cell carcinoma/ (22286)
4. (tcc or transitional cell).mp. (28444)
5. or/1-4 (93989)
- 6.((progress\$ or secondary or primar\$ or initia\$ or previous or prior) adj3 (muscle adj3 invas\$)).ti,ab,ot. (747)
7. ((progress\$ or secondary or primar\$ or initia\$ or previous or prior) adj3 (invas\$ adj3 (cancer\$ or carcinoma\$ or neoplas\$ or tumor\$r\$ or malignan\$ or disease\$ or muscle))).ti,ab,ot. (7778)
8. ((progress\$ or secondary or primar\$ or initia\$) adj3 (MIBC or MIT)).ti,ab,ot. (1012)
9. (muscle adj3 invas\$ adj6 (progress\$ or secondary or primar\$ or initia\$ or previous or prior)).ti,ab,ot. (1122)
10. (invas\$ adj3 (cancer\$ or carcinoma\$ or neoplas\$ or tumor\$r\$ or malignan\$ or disease\$ or muscle) adj6 (progress\$ or secondary or primar\$ or initia\$ or previous or prior)).ti,ab,ot. (11405)
11. ((MIBC or MIT) adj6 (progress\$ or secondary or primar\$ or initia\$)).ti,ab,ot. (1479)
12. secondary muscle-invasive bladder cancer.ti,ab,ot. (6)
13. primary muscle-invasive bladder cancer.ti,ab,ot. (6)
14. or/6-13 (13827)
15. exp cystectomy/ (22339)
16. (rc or cystectom\$).mp. (47546)
17. or/15-16 (47546)
18. cancer prognosis/ (66439)
19. exp Survival/ (933156)
20. Treatment Outcome/ (744598)
21. (surival\$ or prognos\$ or outcome\$).ti,ab. (2253231)
22. (os or dfs or css or dss).ti,ab. (129744)
23. or/18-22 (3252047)
24. 5 and 14 and 17 and 23 (522)

### Database: MEDLINE( on OVID)

- 1.exp urinary bladder neoplasms/
- 2.((bladder\$ or urotheli\$) adj3 (cancer\$ or carcinoma\$ or neoplas\$ or tumor\$r\$ or malignan\$)).mp.
- 3.exp carcinoma, transitional cell/
- 4.bladder neoplasms/
- 5.(tcc or transitional cell).mp.
- 6.or/1-5

- 7.((progress\$ or secondary or primar\$ or initia\$ or previous or prior) adj3 (muscle adj3 invas\$)).ti,ab,ot
- 8.((progress\$ or secondary or primar\$ or initia\$ or previous or prior) adj3 (invas\$ adj3 (cancer\$ or carcinoma\$ or neoplas\$ or tumo?r\$ or malignan\$ or disease\$ or muscle))).ti,ab,ot
- 9.((progress\$ or secondary or primar\$ or initia\$) adj3 (MIBC or MIT)).ti,ab,ot
- 10.((muscle adj3 invas\$) adj6 (progress\$ or secondary or primar\$ or initia\$ or previous or prior)).ti,ab,ot
- 11.((invas\$ adj3 (cancer\$ or carcinoma\$ or neoplas\$ or tumo?r\$ or malignan\$ or disease\$ or muscle)) adj6 (progress\$ or secondary or primar\$ or initia\$ or previous or prior)).ti,ab,ot
- 12.((MIBC or MIT) adj6 (progress\$ or secondary or primar\$ or initia\$)).ti,ab,ot
- 13.(secondary muscle-invasive bladder cancer).ti,ab,ot
- 14.(primary muscle-invasive bladder cancer).ti,ab,ot
- 15.or/7-14
- 16.exp cystectomy/
- 17.(rc or cystectom\$).mp.
- 18.or/16-17
- 19.exp prognosis
- 20.exp Survival Analysis
- 21.Disease-Free Survival/
- 22.Survival Rate/
- 23.Treatment Outcome/
- 24.(surival\$ or prognos\$ or outcome\$).ti,ab.
- 25.(os or dfs or css or dss).ti,ab.
- 26.or/19-25
- 27.6 and 15 and 18 and 26

#### **Database: SCOPUS**

((TITLE-ABS-KEY(bladder W/3 tumo?r\*) OR TITLE-ABS-KEY(bladder\* W/3 cancer\*) OR TITLE-ABS-KEY(bladder\* W/3 carcinoma\*) OR TITLE-ABS-KEY(bladder\* W/3 neoplasm\*)) OR (TITLE-ABS-KEY(urothelial\* W/3 tumo?r\*) OR TITLE-ABS-KEY(urothelial\* W/3 cancer\*) OR TITLE-ABS-KEY(urothelial\* W/3 carcinoma\*) OR TITLE-ABS-KEY(urothelial\* W/3 neoplasm\*))) AND (TITLE-ABS-KEY(progres\* W/4 invas\*) OR TITLE-ABS-KEY(secondary W/4 invas\*) OR TITLE-ABS-KEY(previous W/4 invas\*) OR TITLE-ABS-KEY(prior W/4 invas\*) OR TITLE-ABS-KEY(primary W/4 invas\*) OR TITLE-ABS-KEY(initia\* W/4 invas\*) OR TITLE-ABS-KEY(progres\* W/4 muscle) OR TITLE-ABS-KEY(secondary W/4 muscle) OR TITLE-ABS-KEY(previous W/4 muscle) OR TITLE-ABS-KEY(prior W/4 muscle) OR TITLE-ABS-KEY(primary W/4 muscle) OR TITLE-ABS-KEY(initia\* W/4 muscle) OR TITLE-ABS-KEY(progres\* W/4 MIBC) OR TITLE-ABS-KEY(secondary W/4 MIBC) OR TITLE-ABS-KEY(previous W/4 MIBC) OR TITLE-ABS-KEY(prior W/4 MIBC) OR TITLE-ABS-KEY(primary W/4 MIBC) OR TITLE-ABS-KEY(initia\* W/4 MIBC) OR TITLE-ABS-KEY(progres\* W/4 MIT) OR TITLE-ABS-KEY(secondary W/4 MIT) OR TITLE-ABS-KEY(previous W/4 MIT) OR TITLE-ABS-KEY(prior W/4 MIT) OR TITLE-ABS-KEY(primary W/4 MIT) OR TITLE-ABS-KEY(initia\* W/4 MIT)) AND



(TITLE-ABS-KEY(cystectomy) OR TITLE-ABS-KEY(RC))

**Database: Cochrane Library**

Cochrane Library

1. MeSH descriptor Urinary Bladder Neoplasms explode all trees
2. (bladder\* NEAR/3 (cancer\* or carcinoma\* or neoplas\* or tumo?r\*)):ti,ab,kw
3. MeSH descriptor Carcinoma, Transitional Cell explode all trees
4. (tcc or transitional cell):ti,ab,kw
5. #1 OR #2 OR #3 OR #4
6. (progress\* or secondary or previous or prior):ti,ab,kw
7. (primar\* or initia\*):ti,ab,kw
8. (muscle NEAR/4 invas\*):ti,ab,kw
9. (invas\* NEAR/4 (disease\* or transitional cell or muscle or tumo?r\*)):ti,ab,kw
10. #8 OR #9
11. #6 AND #7 AND #10
12. (cystectomy or rc):ti,ab,kw
13. MeSH descriptor Cystectomy explode all trees
14. #12 OR #13
15. #5 AND #11 AND #14
